# Supplementary material for: Enhanced susceptibility to predation in corals of compromised condition
Source: PeerJ. 2015 Sep 10;3:e1239. doi: 10.7717/peerj.1239 (PMC4699786; doi:10.7717/peerj.1239)
Supplement: Data S1 [file peerj-03-1239-s003.xlsx]

## Sheet: Sheet1
date	box #	lane #s	treatment	host origin	size of snail	time initial	time final	time elspased	treatment chosen	distance traveled
2013-07-02	VI	1 / 2	D / H	Ap	17.5	2:15p	9:15a	19hrs	affected	at coral
2013-07-02	V	3 / 4	D / H	Ap	20	2:15p	9:15a	19hrs	affected	at coral
2013-07-02	IX	3 / 4	H / D	Ap	27	2:15p	9:15a	19hrs	affected	at coral
2013-07-02	IV	3 / 4	D / H	Ap	23	2:15p	9:15a	19hrs	affected	6 cm
2013-07-29	IV	1 / 2	D / H	Ap	29	5:20p	9:05a	16hrs 45mins	affected	at end of lane
2013-07-29	IV	3 / 4	H / D	Ap	28	5:20p	9:05a	16hrs 45mins	affected	at coral
2013-07-29	II	1 / 2	H / D	Ap	20	5:20p	9:05a	16hrs 45mins	affected	at coral
2013-07-29	VII	1 / 2	D / H	Ap	20	5:20p	9:05a	16hrs 45mins	affected	at coral
2013-07-29	VII	3 / 4	H / D	Ap	25	5:20p	9:05a	16hrs 45mins	affected	at coral
2013-08-14	IX	1 / 2	H / D	Ap	21	1:00p	8:30a	17hrs 30mins	affected	at coral
2013-08-14	IX	3 / 4	D / H	Ap	19	1:00p	8:30a	17hrs 30mins	affected	at coral
2013-08-14	II	1 / 2	D / H	Ap	18	1:00p	8:30a	17hrs 30mins	affected	at coral
2013-08-15	IX	1 / 2	H / D	Ap	20	6:10p	10:00a	15hrs 50mins	affected	at coral
2013-08-15	IX	3 / 4	D / H	Ap	27	6:10p	10:00a	15hrs 50mins	affected	at coral
2013-08-15	VI	3 / 4	H / D	Ap	23	6:10p	10:00a	15hrs 50mins	affected	at coral
2013-09-02	V	1 / 2	D / H	Ap	24	10:35a	6:35p	8hrs	affected	at coral
2013-09-02	IV	1 / 2	D / H	Ap	34	10:35a	6:35p	8hrs	affected	at coral
2013-07-02	VI	3 / 4	H / D	Ap	18.5	2:15p	9:15a	19hrs	healthy	at end
2013-08-14	VIII	3 / 4	H / D	Ap	18	1:00p	8:30a	17hrs 30mins	healthy	at coral
2013-08-14	II	3 / 4	H / D	Ap	19	1:00p	8:30a	17hrs 30mins	healthy	at coral
2013-08-14	VII	1 / 2	H / D	Ap	20	1:00p	8:30a	17hrs 30mins	healthy	at coral
2013-08-15	VIII	3 / 4	H / D	Ap	35	6:10p	10:00a	15hrs 50mins	healthy	at coral
2013-09-02	IX	1 / 2	H / D	Ap	16	10:35a	6:35p	8hrs	healthy	12 cm
2013-07-02	V	1 / 2	H / D	Ap	31	2:15p	9:15a	19hrs	no choice	0 cm
2013-07-02	IX	1 / 2	D / H	Ap	31	2:15p	9:15a	19hrs	no choice	0 cm
2013-07-02	IV	1 / 2	H / D	Ap	19	2:15p	9:15a	19hrs	no choice	0 cm
2013-07-29	II	3 / 4	D / H	Ap	31	5:20p	9:05a	16hrs 45mins	no choice	0 cm
2013-09-02	II	3 / 4	H / D	Ap	24	10:35a	6:35p	8hrs	no choice	0 cm
2013-09-02	III	1 / 2	H / D	Ap	17	10:35a	6:35p	8hrs	no choice	0 cm
2013-09-02	III	3 / 4	D / H	Ap	29	10:35a	6:35p	8hrs	no choice	0 cm
2013-09-02	VIII	1 / 2	D / H	Ap	24	10:35a	6:35p	8hrs	no choice	0 cm
2013-09-02	VIII	3 / 4	H / D	Ap	37	10:35a	6:35p	8hrs	no choice	0 cm
2013-09-02	I	3 / 4	D / H	Ap	20	10:35a	6:35p	8hrs	no choice	0 cm
2013-09-02	V	3 / 4	H / D	Ap	16	10:35a	6:35p	8hrs	no choice	0 cm
2013-09-02	IX	3 / 4	D / H	Ap	23	10:35a	6:35p	8hrs	no choice	0 cm
2013-09-02	IV	3 / 4	H / D	Ap	31	10:35a	6:35p	8hrs	no choice	0 cm
2013-09-02	VII	1 / 2	H / D	Ap	35	10:35a	6:35p	8hrs	no choice	0 cm
2013-09-02	VII	3 / 4	D / H	Ap	28	10:35a	6:35p	8hrs	no choice	0 cm
2013-09-02	X	1 / 2	H / D	Ap	22	10:35a	6:35p	8hrs	no choice	0 cm
2013-09-02	X	3 / 4	D / H	Ap	29	10:35a	6:35p	8hrs	no choice	0 cm
2013-07-09	III	1 / 2	M / H	Ap	31	2:45p	9:10a	18hrs 25mins	affected	6 cm
2013-07-09	III	3 / 4	H / M	Ap	34	2:45p	9:10a	18hrs 25mins	affected	at coral
2013-07-09	X	3 / 4	H / M	Ap	28	2:45p	9:10a	18hrs 25mins	affected	at coral
2013-07-09	VIII	3 / 4	M / H	Ap	31	2:45p	9:10a	18hrs 25mins	affected	at end of lane
2013-07-09	II	1 / 2	M / H	Ap	22	2:45p	9:10a	18hrs 25mins	affected	at coral
2013-07-09	VII	1 / 2	H / M	Ap	18	2:45p	9:10a	18hrs 25mins	affected	at coral
2013-07-09	IX	1 / 2	M / H	Ap	18	2:45p	9:10a	18hrs 25mins	affected	at coral
2013-07-09	IX	3 / 4	H / M	Ap	18	2:45p	9:10a	18hrs 25mins	affected	at coral
2013-07-09	IV	1 / 2	H / M	Ap	19	2:45p	9:10a	18hrs 25mins	affected	at end of lane
2013-07-09	IV	3 / 4	M / H	Ap	19	2:45p	9:10a	18hrs 25mins	affected	at coral
2013-08-15	V	3 / 4	M / H	Ap	27	6:10p	10:00a	15hrs 50mins	affected	at coral
2013-08-15	VII	1 / 2	H / M	Ap	18	6:10p	10:00a	15hrs 50mins	affected	at coral
2013-08-15	III	3 / 4	M / H	Ap	35	6:10p	10:00a	15hrs 50mins	affected	at coral
2013-09-03	IV	1 / 2	M / H	Ap	23	7:00p	10:00a	15hrs	affected	at end of lane
2013-09-03	IV	3 / 4	H / M	Ap	23	7:00p	10:00a	15hrs	affected	at coral
2013-09-03	VII	3 / 4	M / H	Ap	29	7:00p	10:00a	15hrs	affected	at end of lane
2013-09-03	VI	1 / 2	M / H	Ap	18	7:00p	10:00a	15hrs	affected	at coral
2013-09-04	X	3 / 4	M / H	Ap	20	11:00a	7:00p	8hrs	affected	21 cm
2013-07-09	I	3 / 4	M / H	Ap	19	2:45p	9:10a	18hrs 25mins	healthy	10 cm
2013-07-09	VIII	1 / 2	H / M	Ap	26	2:45p	9:10a	18hrs 25mins	healthy	at end of lane
2013-07-09	II	3 / 4	H / M	Ap	29	2:45p	9:10a	18hrs 25mins	healthy	at coral
2013-07-09	VII	3 / 4	M / H	Ap	22	2:45p	9:10a	18hrs 25mins	healthy	at coral
2013-08-15	V	1 / 2	H / M	Ap	27	6:10p	10:00a	15hrs 50mins	healthy	at coral
2013-09-03	VII	1 / 2	H / M	Ap	20	7:00p	10:00a	15hrs	healthy	at end of lane
2013-09-03	X	3 / 4	M / H	Ap	31	7:00p	10:00a	15hrs	healthy	at end of lane
2013-09-04	IV	1 / 2	M / H	Ap	17	11:00a	7:00p	8hrs	healthy	9 cm
2013-07-09	I	1 / 2	H / M	Ap	20	2:45p	9:10a	18hrs 25mins	no choice	0 cm
2013-07-09	X	1 / 2	M / H	Ap	25	2:45p	9:10a	18hrs 25mins	no choice	0 cm
2013-07-09	VI	1 / 2	M / H	Ap	22	2:45p	9:10a	18hrs 25mins	no choice	0 cm
2013-07-09	VI	3 / 4	H / M	Ap	20	2:45p	9:10a	18hrs 25mins	no choice	0 cm
2013-07-09	V	1 / 2	H / M	Ap	17	2:45p	9:10a	18hrs 25mins	no choice	0 cm
2013-09-02	VI	1 / 2	M / H	Ap	23	10:35a	6:35p	8hrs	no choice	0 cm
2013-09-02	VI	3 / 4	H / M	Ap	34	10:35a	6:35p	8hrs	no choice	0 cm
2013-09-03	I	3 / 4	M / H	Ap	23	7:00p	10:00a	15hrs	no choice	0 cm
2013-09-03	X	1 / 2	H / M	Ap	28	7:00p	10:00a	15hrs	no choice	0 cm
2013-09-04	I	3 / 4	M / H	Ap	32	11:00a	7:00p	8hrs	no choice	0 cm
2013-09-04	IV	3 / 4	H / M	Ap	19	11:00a	7:00p	8hrs	no choice	0 cm
2013-09-04	VII	3 / 4	M / H	Ap	28	11:00a	7:00p	8hrs	no choice	0 cm
2013-09-04	VI	1 / 2	M / H	Ap	23	11:00a	7:00p	8hrs	no choice	0 cm
2013-09-04	VI	3 / 4	M / H	Ap	29	11:00a	7:00p	8hrs	no choice	0 cm
2013-09-04	X	1 / 2	H / M	Ap	25	11:00a	7:00p	8hrs	no choice	0 cm
2013-08-29	VIII	3 / 4	S / H	Ap	32	3:30p	9:00a	17hrs 30mins	healthy	10 cm
2013-08-29	X	1 / 2	S / H	Ap	28	3:30p	9:00a	17hrs 30mins	healthy	at end of lane
2013-08-30	II	1 / 2	H / S	Ap	22	9:35a	6:35p	9hrs	healthy	at end of lane
2013-08-30	IV	1 / 2	H / S	Ap	29	9:35a	6:35p	9hrs	healthy	7 cm
2013-08-30	VI	3 / 4	S / H	Ap	23	9:35a	6:35p	9hrs	healthy	at end of lane
2013-09-02	IX	1 / 2	H / S	Ap	16	7:30p	9:30a	14hrs	healthy	at end of lane
2013-09-02	VI	3 / 4	H / S	Ap	34	7:30p	9:30a	14hrs	healthy	at coral
2013-09-03	II	1 / 2	S / H	Ap	34	7:00p	10:00a	15hrs	healthy	at end of lane
2013-08-29	III	1 / 2	S / H	Ap	41	3:30p	9:00a	17hrs 30mins	no choice	0 cm
2013-08-29	III	3 / 4	H / S	Ap	31	3:30p	9:00a	17hrs 30mins	no choice	0 cm
2013-08-29	I	1 / 2	S / H	Ap	36	3:30p	9:00a	17hrs 30mins	no choice	0 cm
2013-08-29	I	3 / 4	H / S	Ap	23	3:30p	9:00a	17hrs 30mins	no choice	0 cm
2013-08-29	XI	3 / 4	H / S	Ap	35	3:30p	9:00a	17hrs 30mins	no choice	0 cm
2013-08-29	IV	3 / 4	S / H	Ap	28	3:30p	9:00a	17hrs 30mins	no choice	0 cm
2013-08-29	VII	1 / 2	S / H	Ap	25	3:30p	9:00a	17hrs 30mins	no choice	0 cm
2013-08-29	VII	3 / 4	H / S	Ap	28	3:30p	9:00a	17hrs 30mins	no choice	0 cm
2013-08-29	VI	3 / 4	S / H	Ap	31	3:30p	9:00a	17hrs 30mins	no choice	0 cm
2013-08-30	II	3 / 4	S / H	Ap	29	9:35a	6:35p	9hrs	no choice	0 cm
2013-08-30	III	1 / 2	S / H	Ap	29	9:35a	6:35p	9hrs	no choice	0 cm
2013-08-30	III	3 / 4	H / S	Ap	29	9:35a	6:35p	9hrs	no choice	0 cm
2013-08-30	VIII	1 / 2	H / S	Ap	24	9:35a	6:35p	9hrs	no choice	0 cm
2013-08-30	VIII	3 / 4	S / H	Ap	22	9:35a	6:35p	9hrs	no choice	0 cm
2013-08-30	I	1 / 2	S / H	Ap	34	9:35a	6:35p	9hrs	no choice	0 cm
2013-08-30	I	3 / 4	H / S	Ap	24	9:35a	6:35p	9hrs	no choice	0 cm
2013-08-30	V	1 / 2	H / S	Ap	30	9:35a	6:35p	9hrs	no choice	0 cm
2013-08-30	V	3 / 4	S / H	Ap	25	9:35a	6:35p	9hrs	no choice	0 cm
2013-08-30	IX	1 / 2	S / H	Ap	20	9:35a	6:35p	9hrs	no choice	0 cm
2013-08-30	IX	3 / 4	H / S	Ap	19	9:35a	6:35p	9hrs	no choice	0 cm
2013-08-30	IV	3 / 4	S / H	Ap	17	9:35a	6:35p	9hrs	no choice	0 cm
2013-08-30	VII	1 / 2	S / H	Ap	19	9:35a	6:35p	9hrs	no choice	0 cm
2013-08-30	VII	3 / 4	H / S	Ap	23	9:35a	6:35p	9hrs	no choice	0 cm
2013-08-30	VI	1 / 2	H / S	Ap	16	9:35a	6:35p	9hrs	no choice	0 cm
2013-08-30	X	1 / 2	S / H	Ap	24	9:35a	6:35p	9hrs	no choice	0 cm
2013-09-02	IX	3 / 4	S / H	Ap	42	7:30p	9:30a	14hrs	no choice	0 cm
2013-09-02	IV	1 / 2	S / H	Ap	32	7:30p	9:30a	14hrs	no choice	0 cm
2013-09-02	IV	3 / 4	H / S	Ap	35	7:30p	9:30a	14hrs	no choice	0 cm
2013-09-02	VII	3 / 4	S / H	Ap	19	7:30p	9:30a	14hrs	no choice	0 cm
2013-09-02	X	3 / 4	S / H	Ap	20	7:30p	9:30a	14hrs	no choice	0 cm
2013-09-03	II	3 / 4	H / S	Ap	41	7:00p	10:00a	15hrs	no choice	0 cm
2013-09-03	III	3 / 4	S / H	Ap	20	7:00p	10:00a	15hrs	no choice	0 cm
2013-09-03	V	1 / 2	S / H	Ap	17	7:00p	10:00a	15hrs	no choice	0 cm
2013-09-03	V	3 / 4	H / S	Ap	16	7:00p	10:00a	15hrs	no choice	0 cm
2013-09-03	IX	3 / 4	S / H	Ap	35	7:00p	10:00a	15hrs	no choice	0 cm
2013-09-04	II	1 / 2	S / H	Ap	29	11:00a	7:00p	8hrs	no choice	0 cm
2013-09-04	II	3 / 4	H / S	Ap	29	11:00a	7:00p	8hrs	no choice	0 cm
2013-09-04	III	3 / 4	S / H	Ap	16	11:00a	7:00p	8hrs	no choice	0 cm
2013-09-04	VIII	1 / 2	S / H	Ap	34	11:00a	7:00p	8hrs	no choice	0 cm
2013-09-04	VIII	3 / 4	H / S	Ap	31	11:00a	7:00p	8hrs	no choice	0 cm
2013-09-04	V	1 / 2	S / H	Ap	24	11:00a	7:00p	8hrs	no choice	0 cm
2013-09-04	V	3 / 4	H / S	Ap	19	11:00a	7:00p	8hrs	no choice	0 cm
2013-09-04	IX	1 / 2	H / S	Ap	16	11:00a	7:00p	8hrs	no choice	0 cm
2013-09-04	IX	3 / 4	S / H	Ap	34	11:00a	7:00p	8hrs	no choice	0 cm
2013-09-02	X	1 / 2	H / S	Ap	16	7:30p	9:30a	14hrs	snail	at end of lane
2013-09-03	VIII	1 / 2	S / H	Ap	36	7:00p	10:00a	15hrs	snail	9.5 cm
2013-08-29	II	1 / 2	H / S	Ap	20	3:30p	9:00a	17hrs 30mins	snail	at end of lane
2013-08-29	II	3 / 4	S / H	Ap	16	3:30p	9:00a	17hrs 30mins	snail	at snail
2013-08-29	V	3 / 4	S / H	Ap	34	3:30p	9:00a	17hrs 30mins	snail	24 cm
2013-08-29	VI	1 / 2	H / S	Ap	19	3:30p	9:00a	17hrs 30mins	snail	at end of lane
2013-08-29	X	3 / 4	H / S	Ap	22	3:30p	9:00a	17hrs 30mins	snail	at snail
2013-09-03	III	1 / 2	H / S	Ap	16	7:00p	10:00a	15hrs	snail	at snail
2013-09-03	IX	1 / 2	H / S	Ap	17	7:00p	10:00a	15hrs	snail	at end of lane
2013-09-03	I	1 / 2	P / H	Ap	22	7:00p	10:00a	15hrs	affected	at coral
2013-09-03	VI	3 / 4	P / H	Ap	29	7:00p	10:00a	15hrs	affected	16 cm
2013-09-03	VI	3 / 4	P / H	Ac	19	10:25a	6:00p	7hrs 35mins	affected	at coral
2013-07-02	III	3 / 4	H / D	Ac	22	2:15p	9:15a	19hrs	affected	at coral
2013-07-02	II	1 / 2	D / H	Ac	18	2:15p	9:15a	19hrs	affected	at coral
2013-07-02	VII	1 / 2	H / D	Ac	27	2:15p	9:15a	19hrs	affected	at coral
2013-07-02	VII	3 / 4	D / H	Ac	21	2:15p	9:15a	19hrs	affected	at coral
2013-07-29	VIII	1 / 2	H / D	Ac	18	5:20p	9:05a	16hrs 45mins	affected	at coral
2013-07-29	IX	1 / 2	D / H	Ac	19	5:20p	9:05a	16hrs 45mins	affected	at coral
2013-07-29	VI	1 / 2	H / D	Ac	22	5:20p	9:05a	16hrs 45mins	affected	at coral
2013-07-29	V	1 / 2	D / H	Ac	26	5:20p	9:05a	16hrs 45mins	affected	at coral
2013-07-29	V	3 / 4	H / D	Ac	21	5:20p	9:05a	16hrs 45mins	affected	at coral
2013-08-15	VIII	1 / 2	D / H	Ac	23	6:10p	10:00a	15hrs 50mins	affected	10 cm
2013-09-03	II	1 / 2	D / H	Ac	16	10:25a	6:00p	7hrs 35mins	affected	at coral
2013-09-03	II	3 / 4	H / D	Ac	22	10:25a	6:00p	7hrs 35mins	affected	at coral
2013-09-03	III	1 / 2	H / D	Ac	21	10:25a	6:00p	7hrs 35mins	affected	at coral
2013-09-03	III	3 / 4	D / H	Ac	19	10:25a	6:00p	7hrs 35mins	affected	at coral
2013-09-03	VIII	3 / 4	H / D	Ac	21	10:25a	6:00p	7hrs 35mins	affected	at coral
2013-09-03	I	3 / 4	D / H	Ac	20	10:25a	6:00p	7hrs 35mins	affected	at coral
2013-09-03	V	1 / 2	D / H	Ac	24	10:25a	6:00p	7hrs 35mins	affected	at coral
2013-09-03	IX	1 / 2	H / D	Ac	14	10:25a	6:00p	7hrs 35mins	affected	at coral
2013-09-03	IX	3 / 4	D / H	Ac	9	10:25a	6:00p	7hrs 35mins	affected	6 cm
2013-09-03	IV	1 / 2	D / H	Ac	13	10:25a	6:00p	7hrs 35mins	affected	at coral
2013-09-03	X	1 / 2	H / D	Ac	18	10:25a	6:00p	7hrs 35mins	affected	at coral
2013-09-03	X	3 / 4	D / H	Ac	17	10:25a	6:00p	7hrs 35mins	affected	at coral
2013-07-02	I	3 / 4	D / H	Ac	18.5	2:15p	9:15a	19hrs	healthy	at coral
2013-07-02	X	1 / 2	D / H	Ac	20	2:15p	9:15a	19hrs	healthy	at coral
2013-07-02	VIII	1 / 2	H / D	Ac	26	2:15p	9:15a	19hrs	healthy	at coral
2013-07-29	IX	3 / 4	H / D	Ac	19	5:20p	9:05a	16hrs 45mins	healthy	at coral
2013-07-29	I	1 / 2	H / D	Ac	16	5:20p	9:05a	16hrs 45mins	healthy	19 cm
2013-09-03	I	1 / 2	H / D	Ac	24	10:25a	6:00p	7hrs 35mins	healthy	at coral
2013-09-03	VI	1 / 2	D / H	Ac	15	10:25a	6:00p	7hrs 35mins	healthy	at end of lane
2013-07-02	III	1 / 2	D / H	Ac	19	2:15p	9:15a	19hrs	no choice	0 cm
2013-07-02	I	1 / 2	H / D	Ac	26	2:15p	9:15a	19hrs	no choice	0 cm
2013-07-02	X	3 / 4	H / D	Ac	24.5	2:15p	9:15a	19hrs	no choice	0 cm
2013-07-02	VIII	3 / 4	D / H	Ac	21	2:15p	9:15a	19hrs	no choice	0 cm
2013-07-02	II	3 / 4	H / D	Ac	19	2:15p	9:15a	19hrs	no choice	0 cm
2013-07-29	VI	3 / 4	D / H	Ac	21	5:20p	9:05a	16hrs 45mins	no choice	0 cm
2013-07-29	I	3 / 4	D / H	Ac	17	5:20p	9:05a	16hrs 45mins	no choice	0 cm
2013-09-03	VIII	1 / 2	D / H	Ac	22	10:25a	6:00p	7hrs 35mins	no choice	0 cm
2013-09-03	V	3 / 4	H / D	Ac	25	10:25a	6:00p	7hrs 35mins	no choice	0 cm
2013-09-03	VII	1 / 2	H / D	Ac	28	10:25a	6:00p	7hrs 35mins	no choice	0 cm
2013-09-03	VII	3 / 4	D / H	Ac	12	10:25a	6:00p	7hrs 35mins	no choice	0 cm
2013-07-29	X	1 / 2	H / M	Ac	19	5:40p	9:05a	16hrs 25mins	affected	at coral
2013-08-14	VI	3 / 4	H / M	Ac	23	1:00p	8:30a	17hrs 30mins	affected	at coral
2013-08-14	V	1 / 2	H / M	Ac	19	1:00p	8:30a	17hrs 30mins	affected	at coral
2013-08-14	V	3 /4	M / H	Ac	25	1:00p	8:30a	17hrs 30mins	affected	at coral
2013-08-14	IV	3 / 4	M / H	Ac	19	1:00p	8:30a	17hrs 30mins	affected	at coral
2013-08-14	VII	3 / 4	M / H	Ac	28	1:00p	8:30a	17hrs 30mins	affected	15 cm
2013-08-14	X	3 / 4	H / M	Ac	23	1:00p	8:30a	17hrs 30mins	affected	at coral
2013-08-14	III	1 / 2	H / M	Ac	17	1:00p	8:30a	17hrs 30mins	affected	at coral
2013-08-15	VI	1 / 2	M / H	Ac	26	6:10p	10:00a	15hrs 50mins	affected	at coral
2013-08-15	IV	3 / 4	M / H	Ac	20	6:10p	10:00a	15hrs 50mins	affected	at coral
2013-08-15	VII	3 / 4	M / H	Ac	22	6:10p	10:00a	15hrs 50mins	affected	at coral
2013-08-15	III	1 / 2	H / M	Ac	20	6:10p	10:00a	15hrs 50mins	affected	at end of lane
2013-09-02	II	1 / 2	M / H	Ac	28	7:30p	9:30a	14hrs	affected	at coral
2013-09-02	II	3 / 4	H / M	Ac	24	7:30p	9:30a	14hrs	affected	at coral
2013-09-02	III	1 / 2	H / M	Ac	17	7:30p	9:30a	14hrs	affected	at coral
2013-09-02	VIII	1 / 2	M / H	Ac	13	7:30p	9:30a	14hrs	affected	at coral
2013-09-02	VIII	3 / 4	H / M	Ac	13	7:30p	9:30a	14hrs	affected	at coral
2013-09-02	I	1 / 2	H / M	Ac	21	7:30p	9:30a	14hrs	affected	at coral
2013-09-02	V	1 / 2	M / H	Ac	20	7:30p	9:30a	14hrs	affected	at coral
2013-09-02	V	3 / 4	H / M	Ac	19	7:30p	9:30a	14hrs	affected	at coral
2013-07-29	X	3 / 4	M / H	Ac	26	5:40p	9:05a	16hrs 25mins	healthy	at end of lane
2013-07-29	III	1 / 2	M / H	Ac	28	5:40p	9:05a	16hrs 25mins	healthy	at coral
2013-08-14	VI	1 / 2	M / H	Ac	20	1:00p	8:30a	17hrs 30mins	healthy	15 cm
2013-08-14	I	1 / 2	M / H	Ac	21	1:00p	8:30a	17hrs 30mins	healthy	at coral
2013-08-14	I	3 / 4	H / M	Ac	25	1:00p	8:30a	17hrs 30mins	healthy	at coral
2013-08-14	IV	1 / 2	H / M	Ac	26	1:00p	8:30a	17hrs 30mins	healthy	at coral
2013-08-14	X	1 / 2	M / H	Ac	14	1:00p	8:30a	17hrs 30mins	healthy	at coral
2013-08-14	III	3 / 4	M / H	Ac	21	1:00p	8:30a	17hrs 30mins	healthy	at coral
2013-08-15	I	1 / 2	M / H	Ac	17	6:10p	10:00a	15hrs 50mins	healthy	20 cm
2013-08-15	I	3 / 4	H / M	Ac	25	6:10p	10:00a	15hrs 50mins	healthy	at end of lane
2013-08-15	II	1 / 2	M / H	Ac	23	6:10p	10:00a	15hrs 50mins	healthy	at end of lane
2013-08-15	II	3 / 4	H / M	Ac	14	6:10p	10:00a	15hrs 50mins	healthy	at end of lane
2013-07-29	III	3 / 4	H / M	Ac	22	5:40p	9:05a	16hrs 25mins	no choice	0 cm
2013-08-14	VIII	1 / 2	D / H	Ac	17	1:00p	8:30a	17hrs 30mins	no choice	0 cm
2013-08-15	IV	1 / 2	H / M	Ac	18	6:10p	10:00a	15hrs 50mins	no choice	0 cm
2013-08-15	X	1 / 2	M / H	Ac	22	6:10p	10:00a	15hrs 50mins	no choice	0 cm
2013-08-15	X	3 / 4	H / M	Ac	19	6:10p	10:00a	15hrs 50mins	no choice	0 cm
2013-09-02	III	3 / 4	M / H	Ac	22	7:30p	9:30a	14hrs	no choice	0 cm
2013-09-02	I	3 / 4	M / H	Ac	25	7:30p	9:30a	14hrs	no choice	0 cm
2013-08-30	II	1 / 2	H / S	Ac	12	7:00p	9:00a	14hrs	healthy	at coral
2013-08-30	III	1 / 2	S / H	Ac	20	7:00p	9:00a	14hrs	healthy	at coral
2013-08-30	III	3 / 4	H / S	Ac	21	7:00p	9:00a	14hrs	healthy	at coral
2013-08-30	VIII	1 / 2	H / S	Ac	13	7:00p	9:00a	14hrs	healthy	at coral
2013-08-30	I	1 / 2	S / H	Ac	17	7:00p	9:00a	14hrs	healthy	at coral
2013-08-30	I	3 / 4	H / S	Ac	16	7:00p	9:00a	14hrs	healthy	at coral
2013-08-30	IX	1 / 2	S / H	Ac	8	7:00p	9:00a	14hrs	healthy	at coral
2013-08-30	IV	1 / 2	H / S	Ac	15	7:00p	9:00a	14hrs	healthy	at coral
2013-08-30	VII	1 / 2	S / H	Ac	22	7:00p	9:00a	14hrs	healthy	at coral
2013-08-30	VII	3 / 4	H / S	Ac	17	7:00p	9:00a	14hrs	healthy	at coral
2013-08-30	VI	1 / 2	H / S	Ac	26	7:00p	9:00a	14hrs	healthy	at coral
2013-08-30	X	1 / 2	S / H	Ac	23	7:00p	9:00a	14hrs	healthy	at coral
2013-08-30	X	3 / 4	H / S	Ac	28	7:00p	9:00a	14hrs	healthy	at coral
2013-08-31	II	1 / 2	H / S	Ac	25	9:30a	5:30p	8hrs	healthy	at coral
2013-08-31	III	1 / 2	S / H	Ac	18	9:30a	5:30p	8hrs	healthy	at end of lane
2013-08-31	III	3 / 4	H / S	Ac	19	9:30a	5:30p	8hrs	healthy	at coral
2013-08-31	VIII	3 / 4	S / H	Ac	22	9:30a	5:30p	8hrs	healthy	at coral
2013-08-31	I	1 / 2	S / H	Ac	8	9:30a	5:30p	8hrs	healthy	at coral
2013-08-31	V	3 / 4	S / H	Ac	13	9:30a	5:30p	8hrs	healthy	at coral
2013-08-31	VII	1 / 2	S / H	Ac	22	9:30a	5:30p	8hrs	healthy	at coral
2013-08-31	VII	3 / 4	H / S	Ac	12	9:30a	5:30p	8hrs	healthy	at coral
2013-08-31	VI	1 / 2	H / S	Ac	22	9:30a	5:30p	8hrs	healthy	6.5 cm
2013-08-31	X	1 / 2	S / H	Ac	24	9:30a	5:30p	8hrs	healthy	at coral
2013-08-30	V	1 / 2	H / S	Ac	13	7:00p	9:00a	14hrs	no choice	0 cm
2013-08-30	IX	3 / 4	H / S	Ac	18	7:00p	9:00a	14hrs	no choice	0 cm
2013-08-30	IV	3 / 4	S / H	Ac	18	7:00p	9:00a	14hrs	no choice	0 cm
2013-08-30	VI	3 / 4	S / H	Ac	25	7:00p	9:00a	14hrs	no choice	0 cm
2013-08-31	II	3 / 4	S / H	Ac	22	9:30a	5:30p	8hrs	no choice	0 cm
2013-08-31	V	1 / 2	H / S	Ac	18	9:30a	5:30p	8hrs	no choice	0 cm
2013-08-31	IX	1 / 2	S / H	Ac	16	9:30a	5:30p	8hrs	no choice	0 cm
2013-08-31	IX	3 / 4	H / S	Ac	14	9:30a	5:30p	8hrs	no choice	0 cm
2013-08-31	IV	1 / 2	S / H	Ac	17	9:30a	5:30p	8hrs	no choice	0 cm
2013-08-31	IV	3 / 4	H / S	Ac	13	9:30a	5:30p	8hrs	no choice	0 cm
2013-08-30	II	3 / 4	S / H	Ac	21	7:00p	9:00a	14hrs	snail	6 cm
2013-08-30	VIII	3 / 4	S / H	Ac	22	7:00p	9:00a	14hrs	snail	at end of lane
2013-08-30	V	3 / 4	S / H	Ac	13	7:00p	9:00a	14hrs	snail	at snail
2013-08-31	I	3 / 4	H / S	Ac	15	9:30a	5:30p	8hrs	snail	at snail
2013-08-31	VI	3 / 4	S / H	Ac	19	9:30a	5:30p	8hrs	snail	at snail
